# Supplementary material for: Functionalization of a plasmonic Au/TiO2 photocatalyst with an Ag co-catalyst for quantitative reduction of nitrobenzene to aniline in 2-propanol suspensions under irradiation of visible light
Source: Royal Society of Chemistry journal article supplement (doi:10.1039/c3cc39096a), 2013-01-01
Supplement: c3cc39096a.pdf [file c3cc39096a.pdf]

Supplementary Information for

**Functionalization of plasmonic Au/TiO<sub>2</sub> photocatalyst with Ag  
co-catalyst for quantitative reduction of nitrobenzene to aniline in  
2-propanol suspensions under irradiation of visible light**

**Experimental procedure**

Loading of 0.5 wt% Ag nanoparticles on TiO<sub>2</sub> (preparation of TiO<sub>2</sub>-Ag) was performed by the PH method. TiO<sub>2</sub> powder was suspended in 10 cm<sup>3</sup> of an aqueous solution of methanol (50 vol%) in a test tube and the test tube was sealed with a rubber septum under argon (Ar). An aqueous solution of silver(I) sulfate (Ag<sub>2</sub>SO<sub>4</sub>) as a metal source was injected into the sealed test tube and then photoirradiated for 1 h at  $\lambda > 300$  nm by a 400-W high-pressure mercury arc (Eiko-sha, Osaka) with magnetic stirring in a water bath continuously kept at 298 K. The Ag source was reduced by photogenerated electrons and Ag was deposited on the surface of TiO<sub>2</sub> particles. Analysis of the liquid phase after photodeposition revealed that the Ag source had been almost completely (>99.9%) deposited on the TiO<sub>2</sub> particles. The resultant powder was washed repeatedly with distilled water and then dried at 310 K overnight under air.

Colloidal Au nanoparticles were prepared using the method reported by Frens.<sup>S1)</sup> To 750 cm<sup>3</sup> of an aqueous tetrachloroauric acid (HAuCl<sub>4</sub>) solution (0.49 mmol dm<sup>-3</sup>), 100 cm<sup>3</sup> of an aqueous solution containing sodium citrate (39 mmol dm<sup>-3</sup>) was added. The solution was heated and boiled for 1 h. After the color of the solution had changed from deep blue to deep red, the solution was boiled for a further 30 min. After cooling the solution to room temperature, Amberlite MB-1 (ORGANO, 60 cm<sup>3</sup>) was added to remove excess sodium citrate. After 1-h treatment, MB-1 was removed from the solution using a glass filter. Loading of 2.0 wt% Au particles on

the TiO<sub>2</sub>-Ag samples was performed by the CPH method.<sup>8g)</sup> A TiO<sub>2</sub>-Ag sample (82 mg) was suspended in 20 cm<sup>3</sup> of an aqueous solution of colloidal Au nanoparticles (0.085 mg cm<sup>-3</sup>) in a test tube and the test tube was sealed with a rubber septum under Ar. An aqueous solution of oxalic acid (50 μmol) was injected into the sealed test tube. The mixture was photoirradiated at λ>300 nm by a 400-W high-pressure mercury arc under Ar with magnetic stirring in a water bath continuously kept at 298 K. The resultant powder was washed repeatedly with distilled water and then dried at 310 K overnight under air. Ag-free samples (Au/TiO<sub>2</sub>) were also prepared by the same method using bare TiO<sub>2</sub> samples. Hereafter, an Au-loaded TiO<sub>2</sub>-Ag sample is designated as Au/TiO<sub>2</sub>-Ag. Morphology of the samples was observed under a JEOL JEM-3010 transmission electron microscope (TEM) operated at 300 kV in the Joint Research Center of Kinki University.

The dried photocatalyst powder (50 mg) was suspended in a 2-propanol solution (5 cm<sup>3</sup>), bubbled with Ar, and sealed with a rubber septum. The suspension was irradiated with visible light of a 500 W xenon (Xe) lamp (Ushio, Tokyo) filtered with a Y-48 cut filter (AGC Techno Glass) (450-600 nm: 83 mW cm<sup>-2</sup>) with magnetic stirring in a water bath continuously kept at 298 K (Figure S1). The amounts of H<sub>2</sub> and CO<sub>2</sub> in the gas phase were measured using a Shimadzu GC-8A gas chromatograph equipped with an MS-5A column and Porapak QS column, respectively. The amounts of nitrobenzene and aniline in the liquid phase were determined with a Shimadzu GC-14B gas chromatograph equipped with a DB-1 capillary column (30 m, 0.25 mm). The amount of acetone in the liquid phase was determined with a Shimadzu GC-14A gas chromatograph equipped with a fused silica capillary column (HiCap-CBP20, 25 m, 0.22 mm). Toluene was used as an internal standard sample. The amounts of nitrobenzene, aniline and acetone were determined from the ratios of the peak areas of nitrobenzene, aniline and acetone to the peak area of toluene.

## Results

Absorption spectra of  $\text{TiO}_2$ ,  $\text{TiO}_2\text{-Ag}$ ,  $\text{Au/TiO}_2$  and  $\text{Au/TiO}_2\text{-Ag}$  samples are shown in Figure S1. Strong photoabsorption was observed at around 550 nm for the Au-loaded samples.

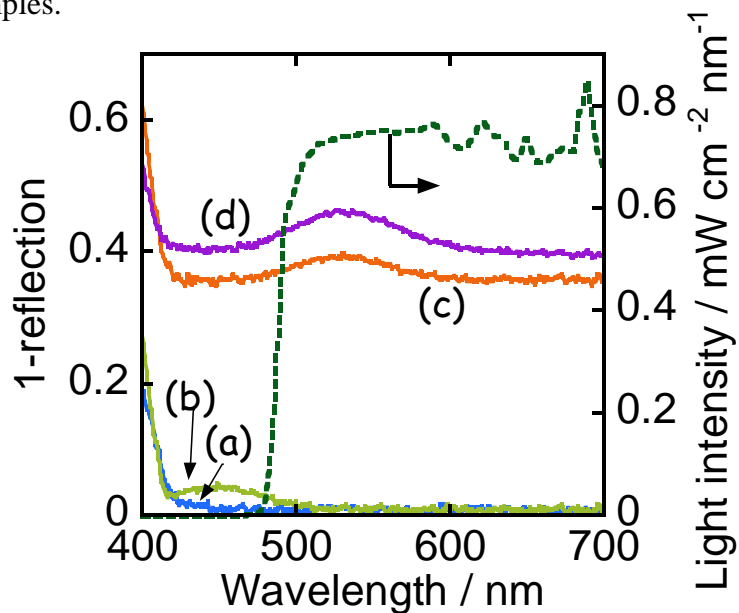

**Figure S1** Absorption spectra of the (a)  $\text{TiO}_2$ , (b)  $\text{TiO}_2\text{-Ag}$ , (c)  $\text{Au/TiO}_2$  and (d)  $\text{Au/TiO}_2\text{-Ag}$  samples and visible light irradiated to reaction systems from a Xe lamp with a Y-48 filter.

Results for nitrobenzene reduction under various conditions are summarized in

Table S1

**Table S1** Reduction of nitrobenzene in 2-propanol suspensions of various photocatalysts under irradiation of visible light from a Xe lamp with a Y-48 cut filter in the absence of O<sub>2</sub><sup>a</sup>

| Entry | photocatalyst           | <sup>b</sup> Light intensity | Time | <sup>c</sup> Conv. | <sup>c</sup> Sel. |
|-------|-------------------------|------------------------------|------|--------------------|-------------------|
|       |                         | / mW cm <sup>-2</sup>        | / h  | / %                | / %               |
| 1     | Au/TiO <sub>2</sub> -Ag | 83                           | 10   | >99                | >99               |
| 2     | Au/TiO <sub>2</sub>     | 83                           | 10   | 54                 | 96                |
| 3     | Au/TiO <sub>2</sub> -Ag | 0(dark)                      | 10   | trace              | -                 |
| 4     | TiO <sub>2</sub> -Ag    | 83                           | 10   | trace              | -                 |
| 5     | TiO <sub>2</sub>        | 83                           | 10   | trace              | -                 |
| 6     | non                     | 83                           | 10   | trace              | -                 |

<sup>a</sup>Nitrobenzene: 75 μmol, photocatalyst: 50 mg, 2-propanol: 5cm<sup>3</sup>. <sup>b</sup>Visible light in the range of 450-600 nm. <sup>c</sup>Determined by GC using the internal standard method.

## References

S1) G. Frens, *Nat. Phys. Sci.* 1973, 241, 20–22.
